# Supplementary material for: Eugenol and capsaicin exhibit anti-metastatic activity via modulating TGF-β signaling in gastric carcinoma
Source: Royal Society of Chemistry journal article supplement (doi:10.1039/d0fo00887g), 2020-01-01
Supplement: d0fo00887g4.pdf [file d0fo00887g4.pdf]

1 **Supplementary Figure 1:** Cell count at various concentrations of eugenol and capsaicin by using the Trypan  
2 Blue exclusion method with the PBMC (isolated from healthy individual) and AGS gastric cancer cells. All the line  
3 diagrams shown in the image are represented as mean  $\pm$  s.e.m. From the diagram, IC<sup>25</sup> of eugenol  
4 and capsaicin on AGS gastric cancer cell line for 12 hrs are calculated.

5 **Supplementary Figure 2:** A) For determining intracellular TGF- $\beta$  expression (pg/ $\mu$ L), both  
6 phytochemical treated and untreated AGS cell supernatants and cell lysates were collected and  
7 ELISA is performed. B-C) Relative mRNA expression of TGF- $\beta$ , TGF- $\beta$ R1, TGF- $\beta$ R2 in both  
8 phytochemical treated and untreated AGS cells by semi-quantitative PCR. All the bar diagrams  
9 shown in the image are represented as mean  $\pm$  s.e.m. ns >P 0.01, \*<P 0.01, \*\*<P 0.05, (student *t*-  
10 test) compared with control cells.

11 **Supplementary Figure 3:** IC<sup>25</sup> concentration of eugenol and capsaicin are also calculated by  
12 treating SW620 cells with varying concentrations of phytochemicals for 12 hrs and living cells are  
13 counted by using Trypan Blue exclusion method. All the line diagrams shown in the image are  
14 represented as mean  $\pm$  s.e.m.

15

16

17
