# Supplementary figures and images for: Eugenol and capsaicin exhibit anti-metastatic activity via modulating TGF-β signaling in gastric carcinoma
Source: Royal Society of Chemistry journal article supplement (doi:10.1039/d0fo00887g), 2020-01-01

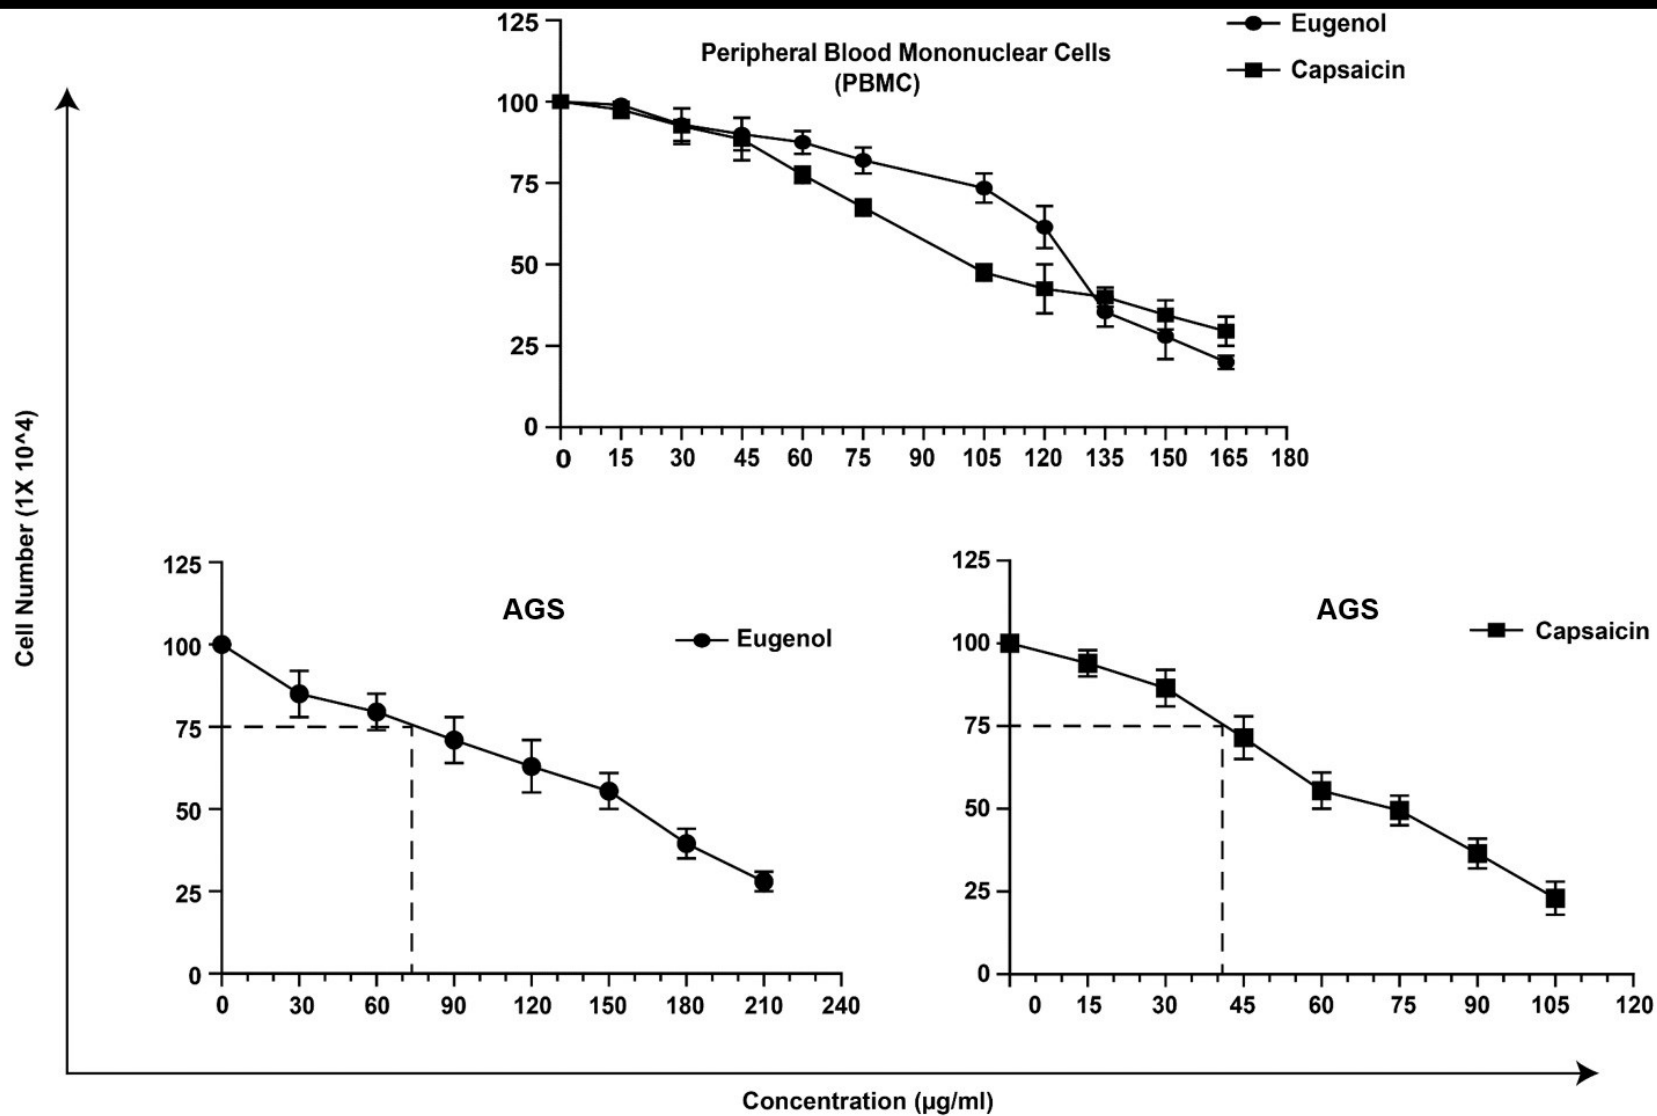

Supplement: d0fo00887g1.pdf [file d0fo00887g1.pdf]

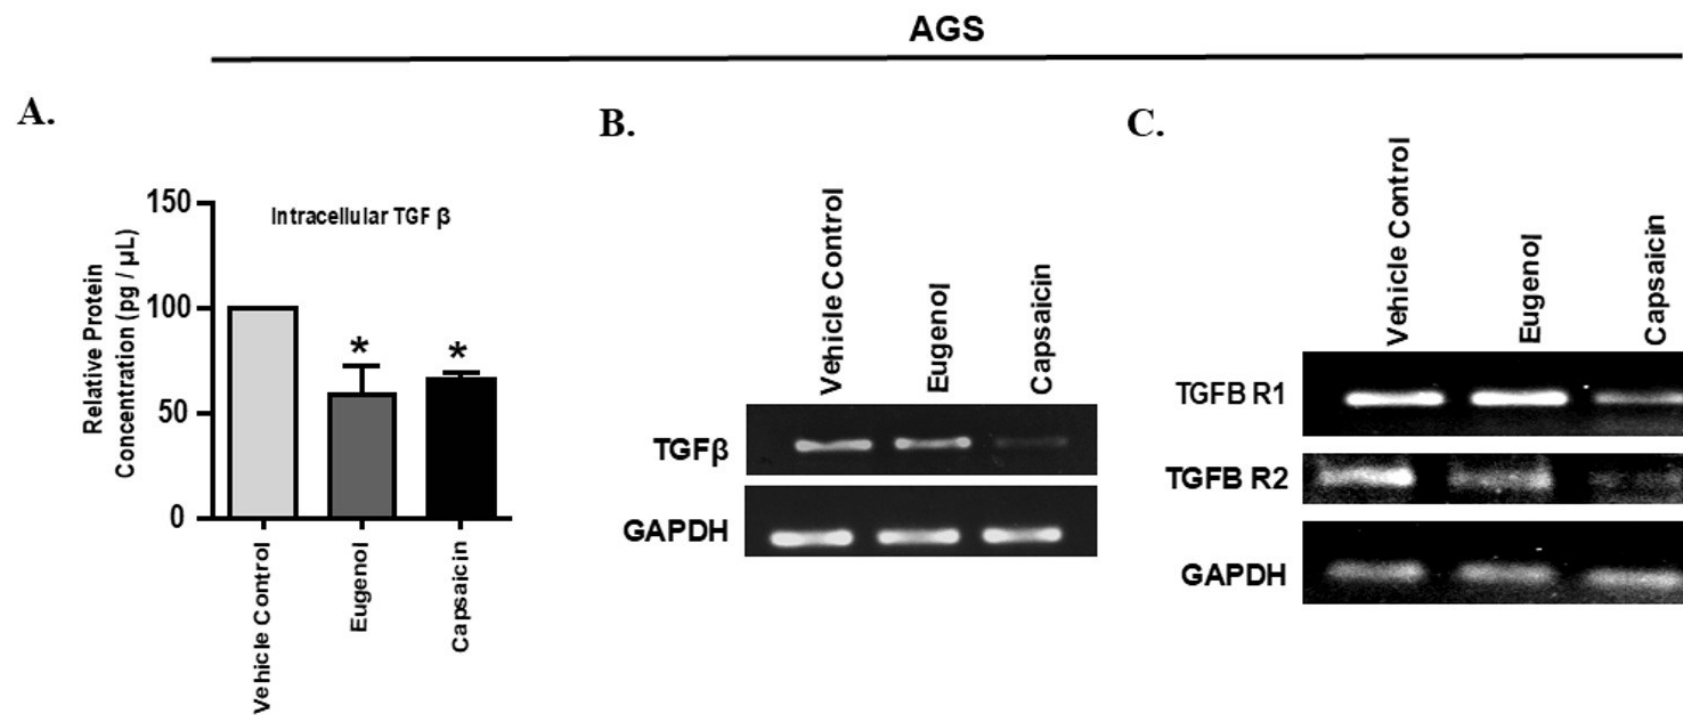

Supplement: d0fo00887g2.pdf [file d0fo00887g2.pdf]

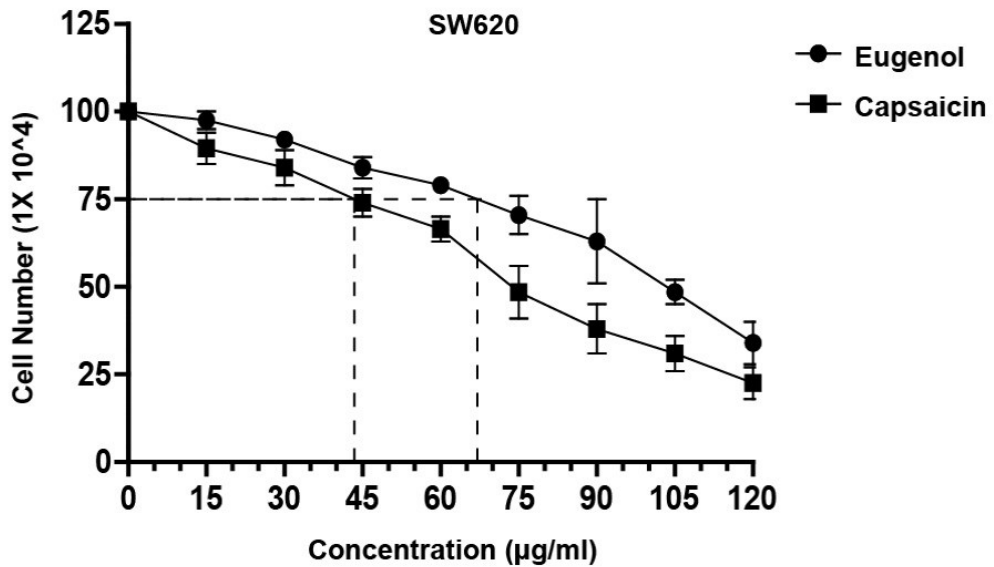

Supplement: d0fo00887g3.pdf [file d0fo00887g3.pdf]
